# Supplementary material
Source: PubMed Central journal article supplement (PMC5987268)
Supplement: Supplementary_data1.pdf [file Supplementary_data1.pdf]

## **Online Supplementary Data**

### **Search Strategy**

Database: Ovid MEDLINE

1. primary sclerosing cholangitis.mp. or exp Cholangitis, Sclerosing/
2. sclerosing cholangitis.mp.
3. or/1-2
4. smoking.mp or exp smoking/
5. cigarette smoking.mp
6. or/4-5
7. 3 and 6

Database: EMBASE

1. primary sclerosing cholangitis.mp. or exp primary sclerosing cholangitis/
2. sclerosing cholangitis.mp. or exp sclerosing cholangitis/
3. or/1-2
4. smoking.mp or exp smoking/
5. cigarette smoking.mp or exp cigarette smoking/
6. or/4-5
7. 3 and 6
